# Supplementary material for: First-in-human clinical trial of personalized neoantigen vaccines as early intervention in untreated patients with lymphoplasmacytic lymphoma
Source: Research Square preprint supplement (doi:10.21203/rs.3.rs-3315017/v1), 2023-09-21
Supplement: Supplementary file 1 [file 474e2823cfcab25996157d51.pdf]

Phase I Study of an Active Immunotherapy for Asymptomatic Phase  
Lymphoplasmacytic Lymphoma with DNA Vaccines Encoding Antigen-Chemokine  
Fusion  
2009-0465

Core Protocol Information

|                                    |                                                                                                                                                |
|------------------------------------|------------------------------------------------------------------------------------------------------------------------------------------------|
| <u>Short Title</u>                 | Immunotherapy for Asymptomatic Phase Lymphoplasmacytic Lymphoma                                                                                |
| <u>Study Chair:</u>                | Sheeba K. Thomas                                                                                                                               |
| <u>Additional Contact:</u>         | Jasper B. Olsem<br>Kimbra S. Harris<br>Tundra S. Gibson                                                                                        |
| <b>Additional Memo Recipients:</b> | <b>Recipients List</b><br><br><b>OPR Recipients</b> (for OPR use only)<br>None<br><br><b>Study Staff Recipients</b><br>None                    |
| <u>Department:</u>                 | Lymphoma/Myeloma                                                                                                                               |
| <u>Phone:</u>                      | 713-792-2860                                                                                                                                   |
| <u>Unit:</u>                       | 429                                                                                                                                            |
| <b>Study Manager:</b>              | Jasper B. Olsem                                                                                                                                |
| <u>Full Title:</u>                 | Phase I Study of an Active Immunotherapy for Asymptomatic Phase Lymphoplasmacytic Lymphoma with DNA Vaccines Encoding Antigen-Chemokine Fusion |
| <b>Public Description:</b>         | N/A                                                                                                                                            |
| <u>Protocol Type:</u>              | Standard Protocol                                                                                                                              |
| <b>Protocol Phase:</b>             | Phase I                                                                                                                                        |
| <u>Version Status:</u>             | Activated -- Closed to new patient entry as of 09/24/2018                                                                                      |
| <b>Version:</b>                    | 25                                                                                                                                             |
| <u>Document Status:</u>            | Saved as "Final"                                                                                                                               |
| <u>Submitted by:</u>               | Tundra S. Gibson--9/10/2018 12:21:45 PM                                                                                                        |
| <b>OPR Action:</b>                 | Accepted by: Yadira L. Cortez -- 9/24/2018 7:40:21 AM                                                                                          |

Which Committee will review this protocol?

☒ The Clinical Research Committee - (CRC)

## Protocol Body

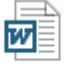

2009-0465\_28August2018\_Final.doc
